# Supplementary material for: High-performance CdScInO thin-film transistors and their stability improvement under negative bias (illumination) temperature stress
Source: Royal Society of Chemistry journal article supplement (doi:10.1039/c9tc04989d), 2019-01-01
Supplement: c9tc04989d1.pdf [file c9tc04989d1.pdf]

## Supporting Information

### High-performance CdScInO thin-film transistors and their stability improvement under negative bias (illumination) temperature stress

Teng Long,<sup>‡a</sup> Xingqiang Dai,<sup>‡a</sup> Linfeng Lan,<sup>\*a</sup> Caihao Deng,<sup>a</sup> Zhuo Chen,<sup>a</sup> Changchun He,<sup>b</sup> Lu Liu,<sup>b</sup> Xiaobao Yang,<sup>b</sup> and Junbiao Peng<sup>a</sup>

<sup>a</sup>State Key Laboratory of Luminescent Materials and Devices, South China University of Technology, Guangzhou, China. E-mail: lanlinfeng@scut.edu.cn

<sup>b</sup>School of Physics Science and Technology, South China University of Technology, Guangzhou, China

<sup>‡</sup>Contributed equally to this work.

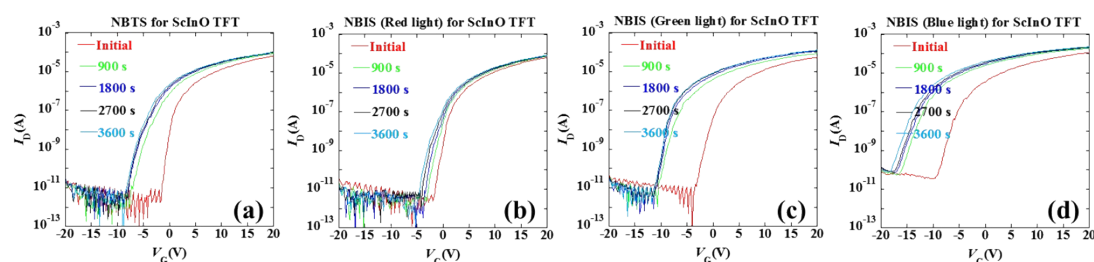

**Figure S1.** NBI/TS stability of the ScInO TFTs. (a) NBTS at 80 °C; (b) NBIS under 650 nm red light illumination; (c) NBIS under 550 nm green light illumination; (d) NBIS under 450 nm blue light illumination.

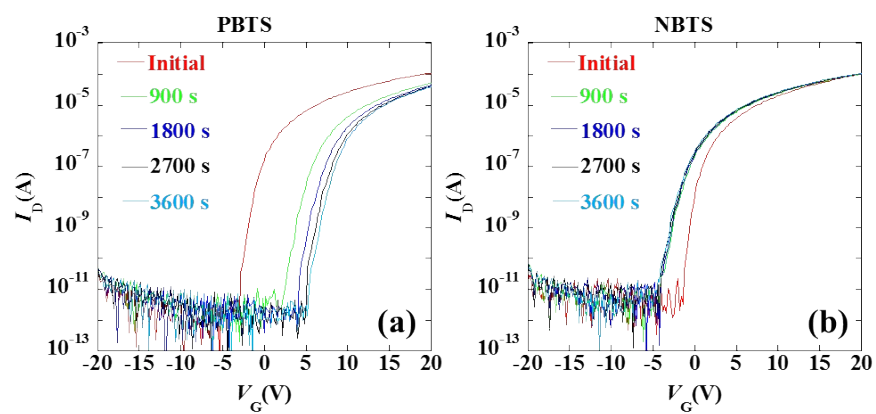

Figure S2. (a) PBTS and (b) NBTS stability at 80 °C

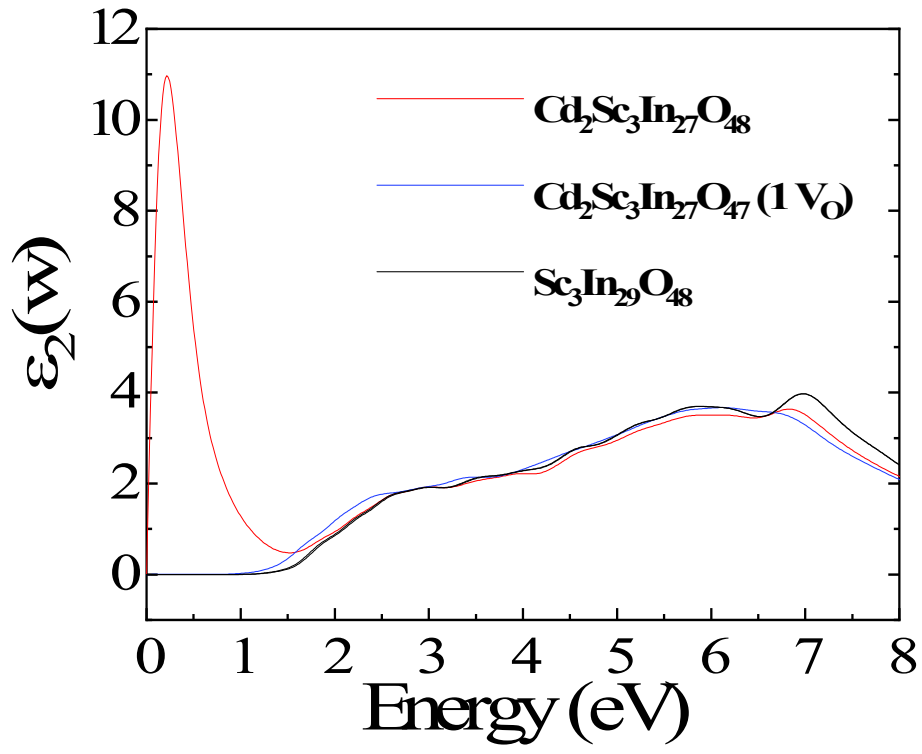

**Figure S3.** The calculated  $\varepsilon_2$  for  $\text{Sc}_3\text{In}_{29}\text{O}_{48}$ ,  $\text{Cd}_2\text{Sc}_3\text{In}_{27}\text{O}_{48}$ , and  $\text{Cd}_2\text{Sc}_3\text{In}_{27}\text{O}_{47}$  with 1  $\text{V}_\text{O}$ .
